# Supplementary material for: KIAA0101 is associated with human renal cell carcinoma proliferation and migration induced by erythropoietin
Source: PubMed Central journal article supplement (PMC4924658; doi:10.18632/oncotarget.5876), 2015-11-12
Supplement: oncotarget-07-13520-s001.pdf [file oncotarget-07-13520-s001.pdf]

## **SUPPLEMENTARY TABLES**

**Supplementary Table S1: The integrated microarray dataset of ccRCC originated from three public available microarray datasets using EB algorithm**

**Supplementary Table S2: Proteomics expression profiling of relative protein abundances elicited by 50 IU/mL r-Hu EPO in 786-O cells**
